# Supplementary material
Source: MDPI journal article supplement (https://www.mdpi.com/2673-3986/3/1/8)
Supplement: s1 [file s1]

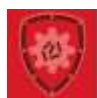

# Supplementary Materials: Treatment of Respiratory Viral Coinfections

Paul Alexander and Hana Dobrovolny

## 1. Basic coinfection model

This section contains the individual infection durations and viral titer peak measurements predicted for treated coinfections by the basic coinfection model.

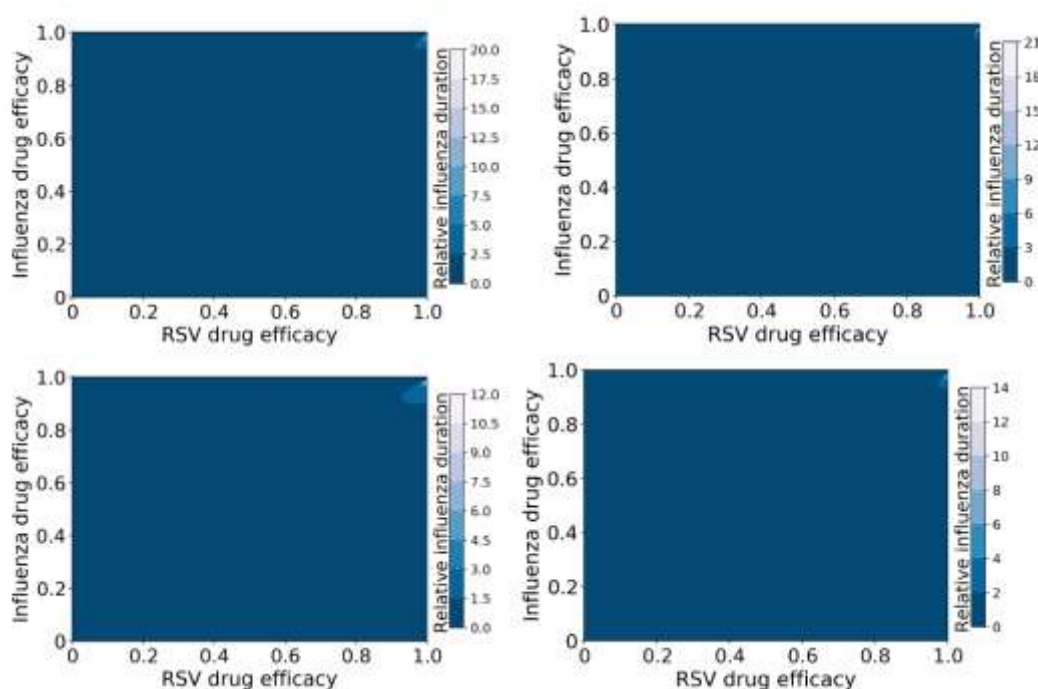

**Figure S1.** Duration of influenza infection for treated influenza and RSV coinfections. Figures show the duration of influenza infection relative to an untreated coinfection where a value of 1 indicates that treatment has not changed the influenza duration. Figures show treatment with both antivirals reducing infection rate (top left); the influenza antiviral reducing infection rate and the RSV antiviral reducing viral production (top right); the influenza antiviral reducing viral production and the RSV antiviral reducing infection rate (bottom left); and both antivirals reducing viral production (bottom right).

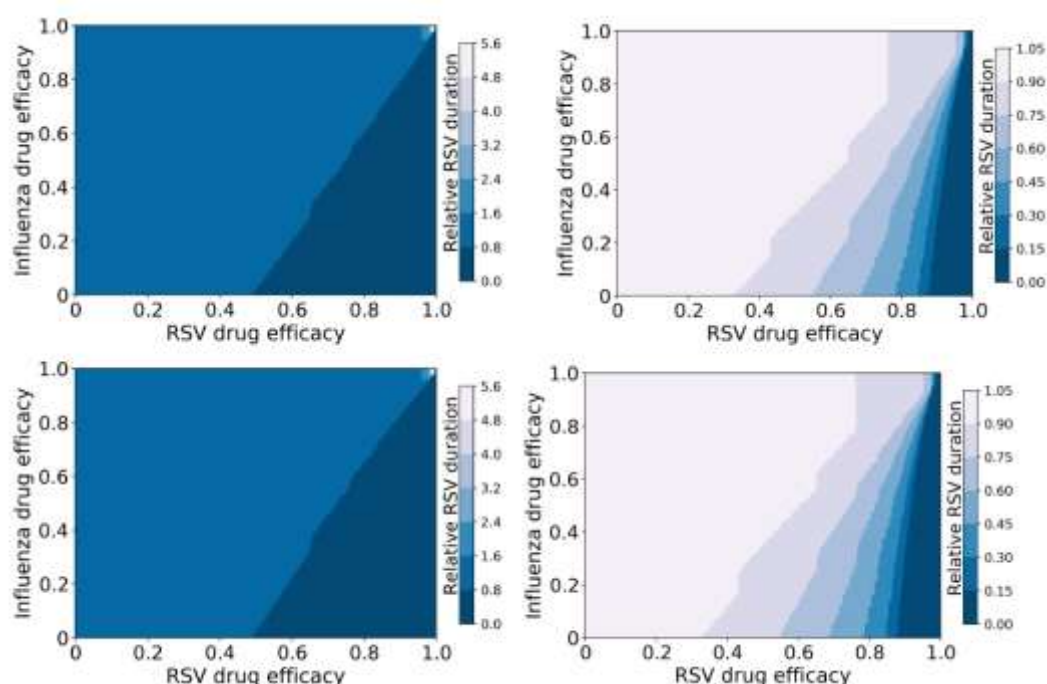

**Figure S2.** Duration of RSV infection for treated influenza and RSV coinfections. Figures show the duration of RSV infection relative to an untreated coinfection where a value of 1 indicates that treatment has not changed the RSV duration. Figures show treatment with both antivirals reducing infection rate (top left); the influenza antiviral reducing infection rate and the RSV antiviral reducing viral production (top right); the influenza antiviral reducing viral production and the RSV antiviral reducing infection rate (bottom left); and both antivirals reducing viral production (bottom right).

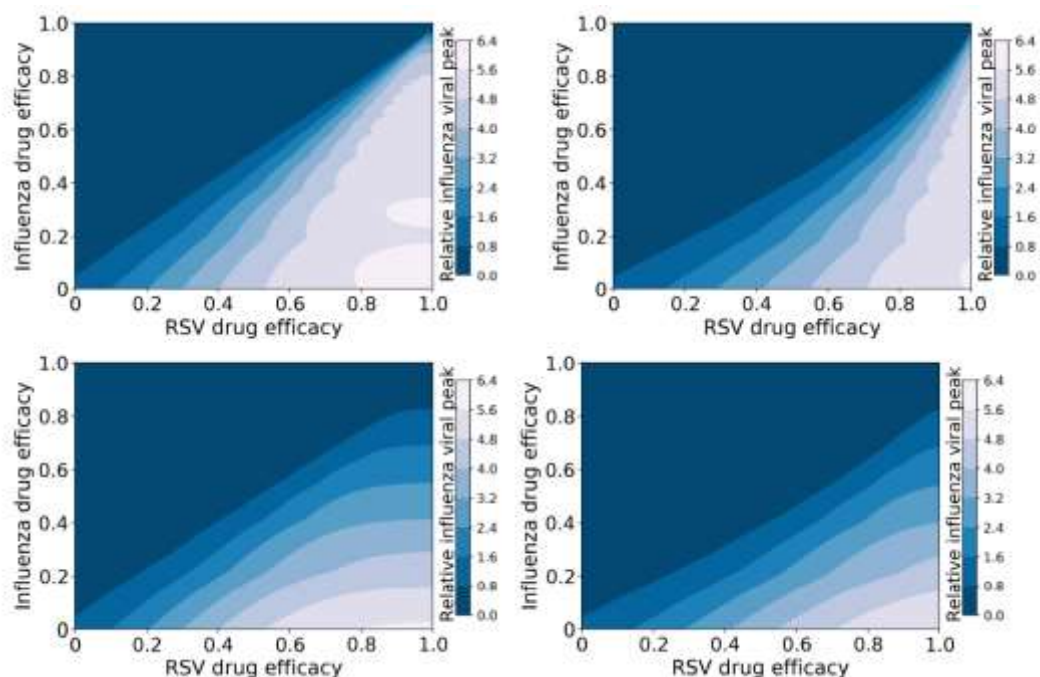

**Figure S3.** Influenza viral titer peak for treated influenza and RSV coinfections. Figures show the influenza viral titer peak relative to an untreated coinfection where a value of 1 indicates that treatment has not changed the peak viral load. Figures show treatment with both antivirals reducing infection rate (top left); the influenza antiviral reducing infection rate and the RSV antiviral reducing viral production (top right); the influenza antiviral reducing viral production and the RSV antiviral reducing infection rate (bottom left); and both antivirals reducing viral production (bottom right).

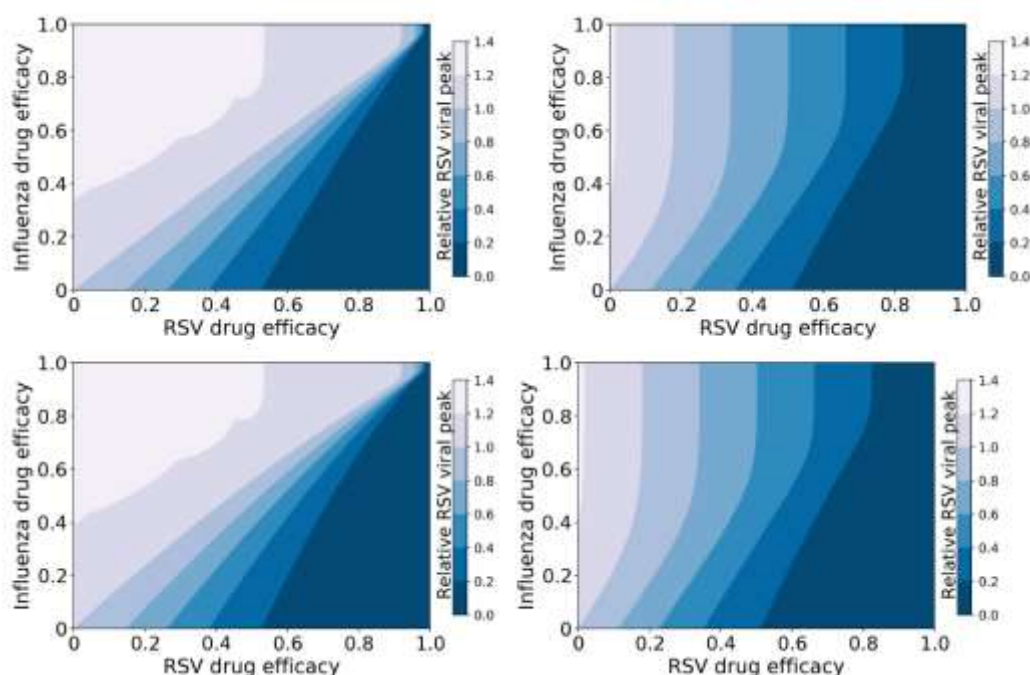

**Figure S4.** RSV viral titer peak for treated influenza and RSV coinfections. Figures show the RSV viral titer peak relative to an untreated coinfection where a value of 1 indicates that treatment has not changed the peak viral load. Figures show treatment with both antivirals reducing infection rate (top left); the influenza antiviral reducing infection rate and the RSV antiviral reducing viral production (top right); the influenza antiviral reducing viral production and the RSV antiviral reducing infection rate (bottom left); and both antivirals reducing viral production (bottom right).

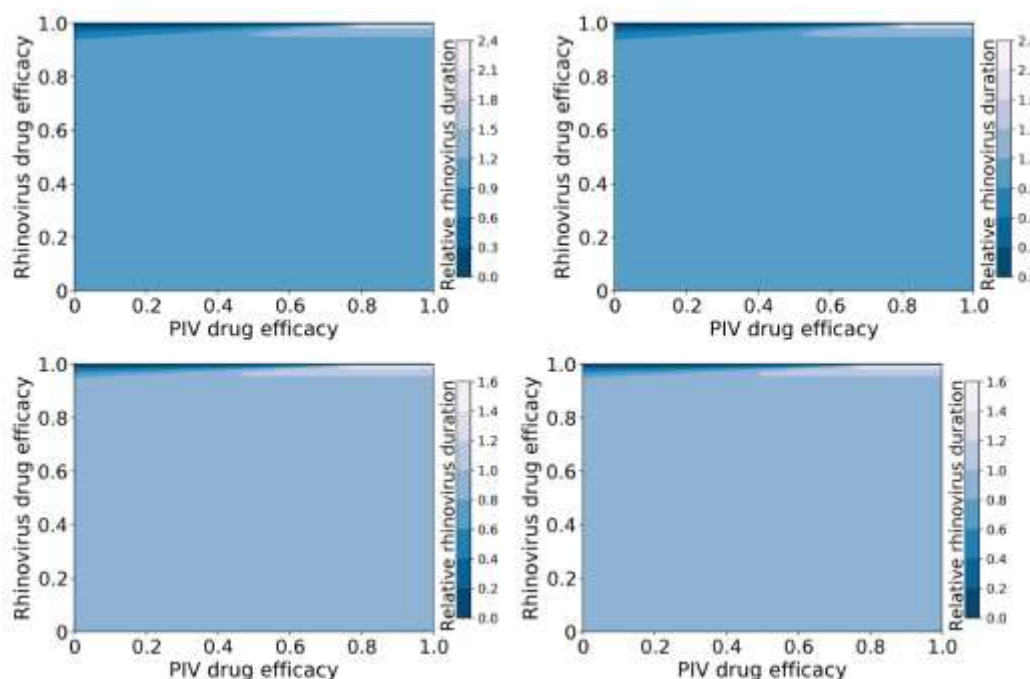

**Figure S5.** Duration of rhinovirus infection for treated rhinovirus and PIV coinfections. Figures show the duration of rhinovirus infection relative to an untreated coinfection where a value of 1 indicates that treatment has not changed the rhinovirus duration. Figures show treatment with both antivirals reducing infection rate (top left); the rhinovirus antiviral reducing infection rate and the PIV antiviral reducing viral production (top right); the rhinovirus antiviral reducing viral production and the PIV antiviral reducing infection rate (bottom left); and both antivirals reducing viral production (bottom right).

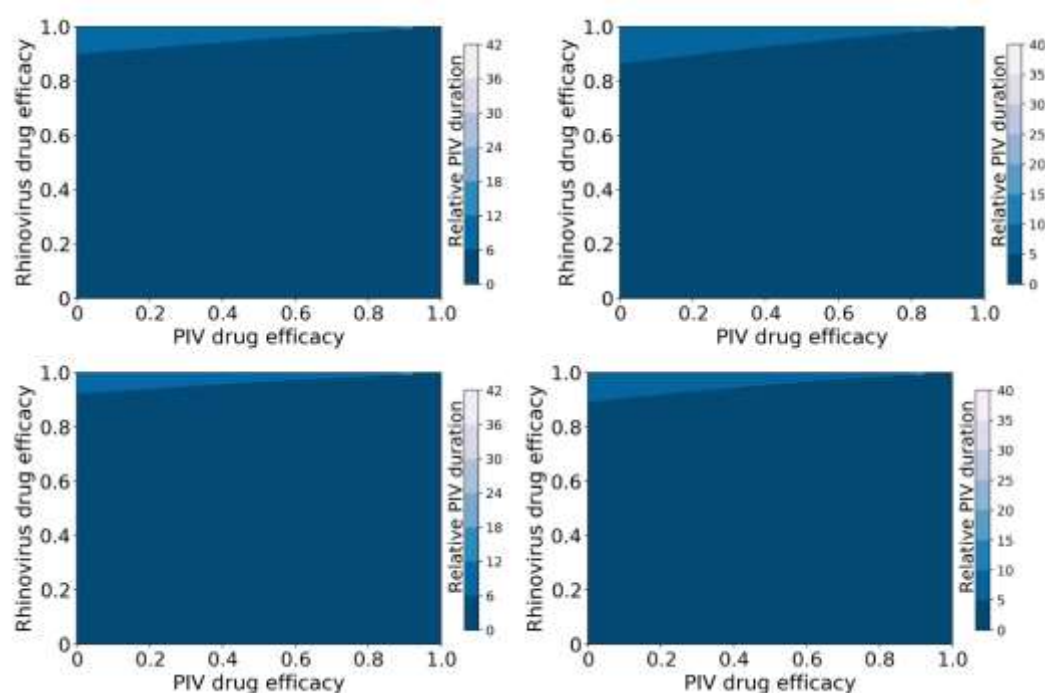

**Figure S6.** Duration of PIV infection for treated rhinovirus and PIV coinfections. Figures show the duration of PIV infection relative to an untreated coinfection where a value of 1 indicates that treatment has not changed the PIV duration. Figures show treatment with both antivirals reducing infection rate (top left); the rhinovirus antiviral reducing infection rate and the PIV antiviral reducing viral production (top right); the rhinovirus antiviral reducing viral production and the PIV antiviral reducing infection rate (bottom left); and both antivirals reducing viral production (bottom right).

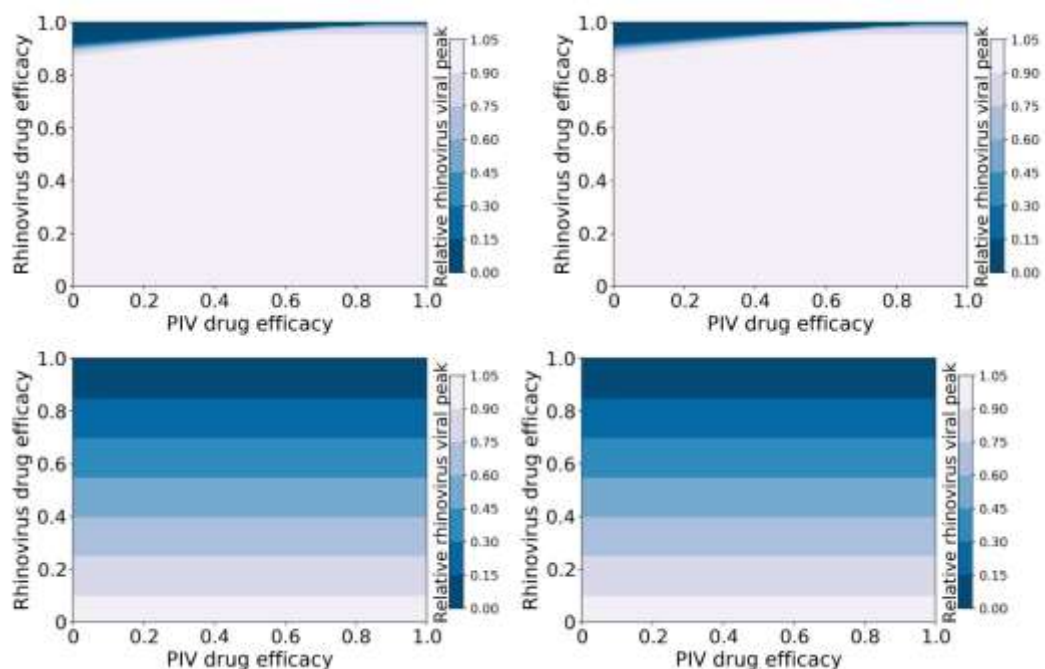

**Figure S7.** Rhinovirus viral titer peak for treated rhinovirus and PIV coinfections. Figures show the rhinovirus viral titer peak relative to an untreated coinfection where a value of 1 indicates that treatment has not changed the peak viral load. Figures show treatment with both antivirals reducing infection rate (top left); the rhinovirus antiviral reducing infection rate and the PIV antiviral reducing viral production (top right); the rhinovirus antiviral reducing viral production and the PIV antiviral reducing infection rate (bottom left); and both antivirals reducing viral production (bottom right).

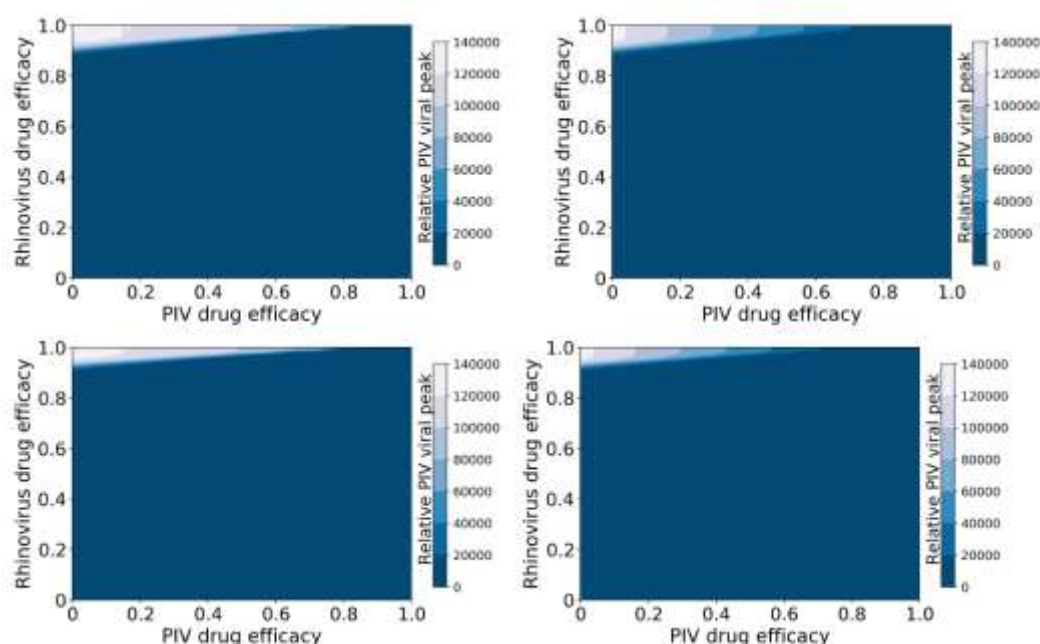

**Figure S8.** PIV viral titer peak for treated rhinovirus and PIV coinfections. Figures show the PIV viral titer peak relative to an untreated coinfection where a value of 1 indicates that treatment has not changed the peak viral load. Figures show treatment with both antivirals reducing infection rate (top left); the rhinovirus antiviral reducing infection rate and the PIV antiviral reducing viral production (top right); the rhinovirus antiviral reducing viral production and the PIV antiviral reducing infection rate (bottom left); and both antivirals reducing viral production (bottom right).

## 2. Superinfection model

This section contains the individual infection durations and viral titer peak measurements predicted for treated coinfections by the superinfection model.

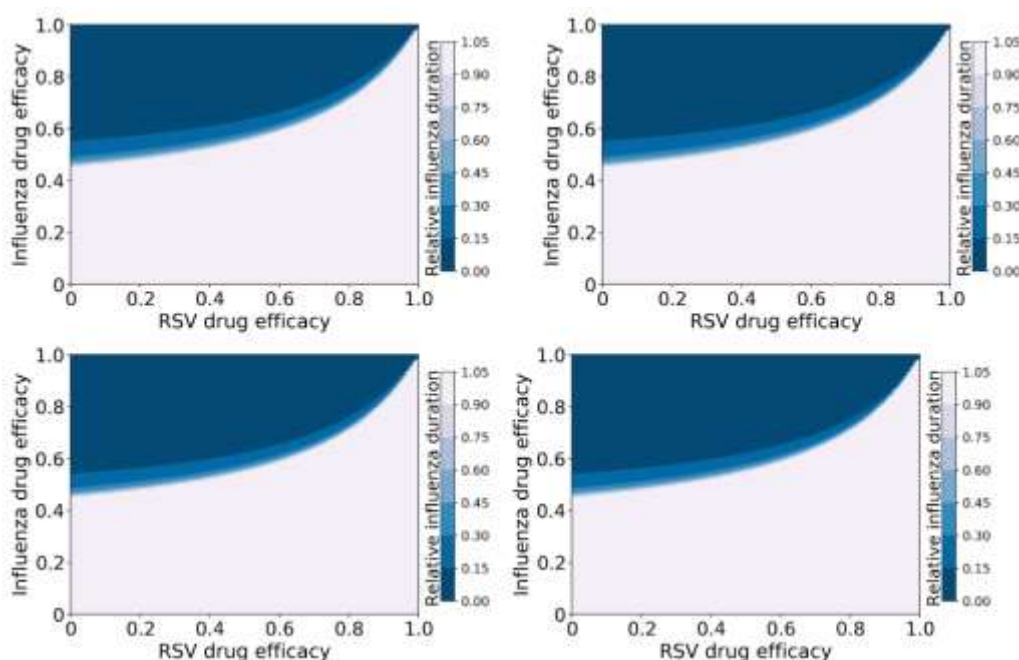

**Figure S9.** Duration of influenza infection for treated influenza and RSV coinfections. Figures show the duration of influenza infection relative to an untreated coinfection where a value of 1 indicates that treatment has not changed the influenza duration. Figures show treatment with both antivirals reducing infection rate (top left); the influenza antiviral reducing infection rate and the RSV antiviral reducing viral production (top right); the influenza antiviral reducing viral production and the RSV antiviral reducing infection rate (bottom left); and both antivirals reducing viral production (bottom right).

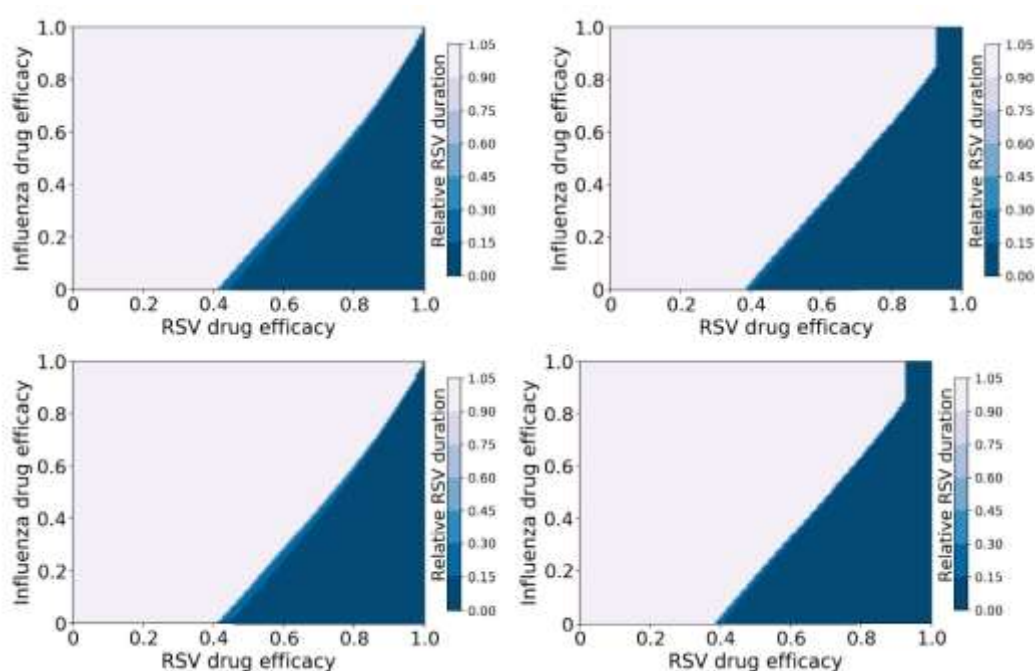

**Figure S10.** Duration of RSV infection for treated influenza and RSV coinfections. Figures show the duration of RSV infection relative to an untreated coinfection where a value of 1 indicates that treatment has not changed the RSV duration. Figures show treatment with both antivirals reducing infection rate (top left); the influenza antiviral reducing infection rate and the RSV antiviral reducing viral production (top right); the influenza antiviral reducing viral production and the RSV antiviral reducing infection rate (bottom left); and both antivirals reducing viral production (bottom right).

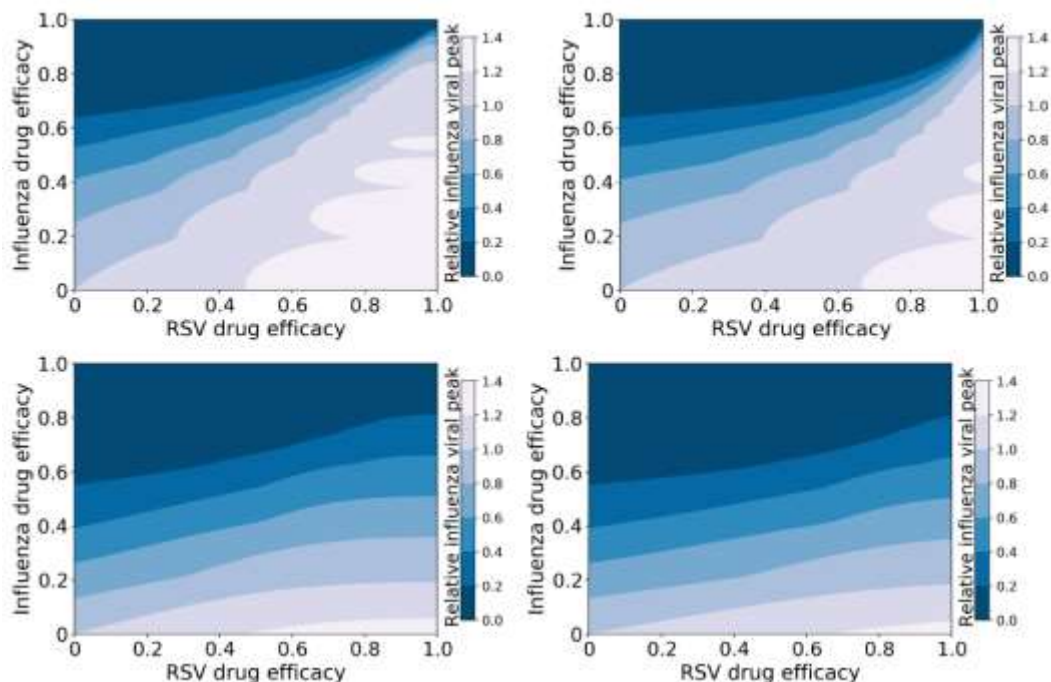

**Figure S11.** Influenza viral titer peak for treated influenza and RSV coinfections. Figures show the influenza viral titer peak relative to an untreated coinfection where a value of 1 indicates that treatment has not changed the peak viral load. Figures show treatment with both antivirals reducing infection rate (top left); the influenza antiviral reducing infection rate and the RSV antiviral reducing viral production (top right); the influenza antiviral reducing viral production and the RSV antiviral reducing infection rate (bottom left); and both antivirals reducing viral production (bottom right).

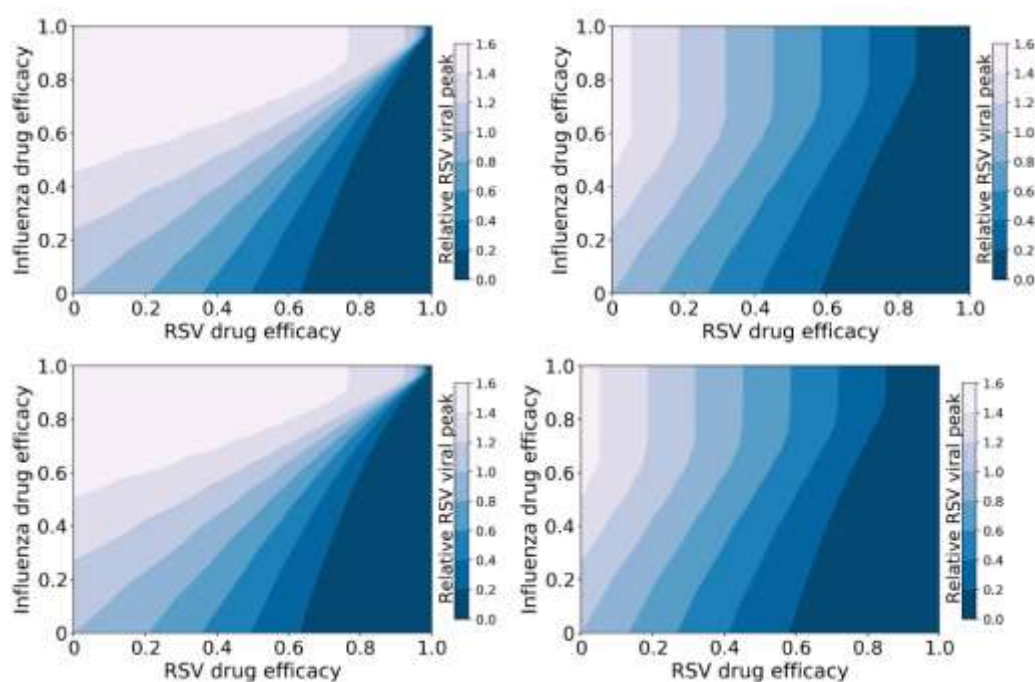

**Figure S12.** RSV viral titer peak for treated influenza and RSV coinfections. Figures show the RSV viral titer peak relative to an untreated coinfection where a value of 1 indicates that treatment has not changed the peak viral load. Figures show treatment with both antivirals reducing infection rate (top left); the influenza antiviral reducing infection rate and the RSV antiviral reducing viral production (top right); the influenza antiviral reducing viral production and the RSV antiviral reducing infection rate (bottom left); and both antivirals reducing viral production (bottom right).

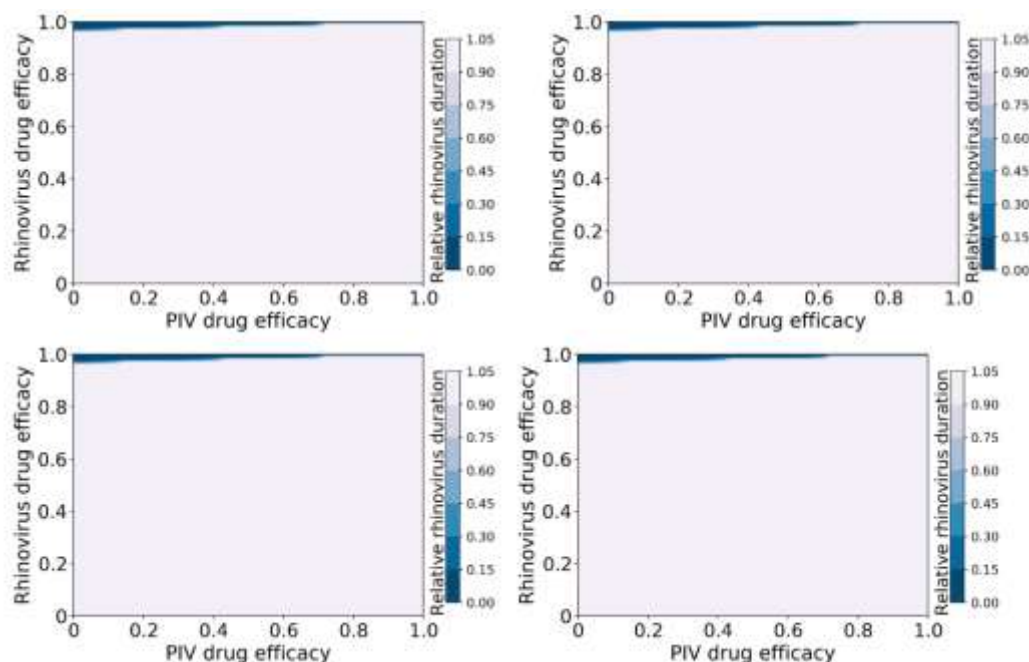

**Figure S13.** Duration of rhinovirus infection for treated rhinovirus and PIV coinfections. Figures show the duration of rhinovirus infection relative to an untreated coinfection where a value of 1 indicates that treatment has not changed the rhinovirus duration. Figures show treatment with both antivirals reducing infection rate (top left); the rhinovirus antiviral reducing infection rate and the PIV antiviral reducing viral production (top right); the rhinovirus antiviral reducing viral production and the PIV antiviral reducing infection rate (bottom left); and both antivirals reducing viral production (bottom right).

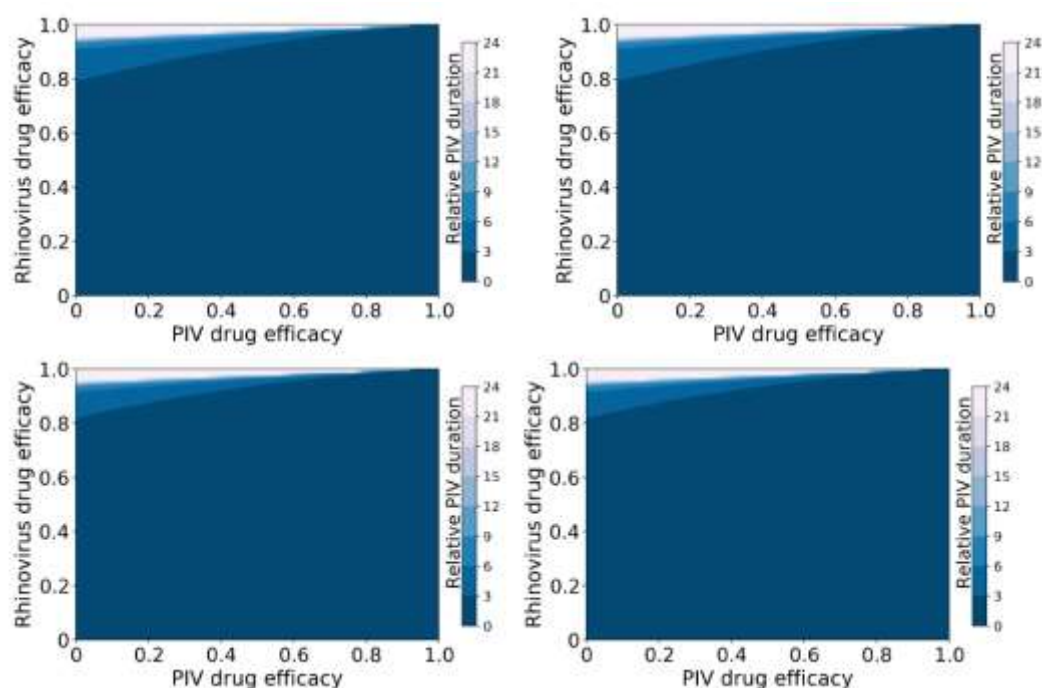

**Figure S14.** Duration of PIV infection for treated rhinovirus and PIV coinfections. Figures show the duration of PIV infection relative to an untreated coinfection where a value of 1 indicates that treatment has not changed the PIV duration. Figures show treatment with both antivirals reducing infection rate (top left); the rhinovirus antiviral reducing infection rate and the PIV antiviral reducing viral production (top right); the rhinovirus antiviral reducing viral production and the PIV antiviral reducing infection rate (bottom left); and both antivirals reducing viral production (bottom right).

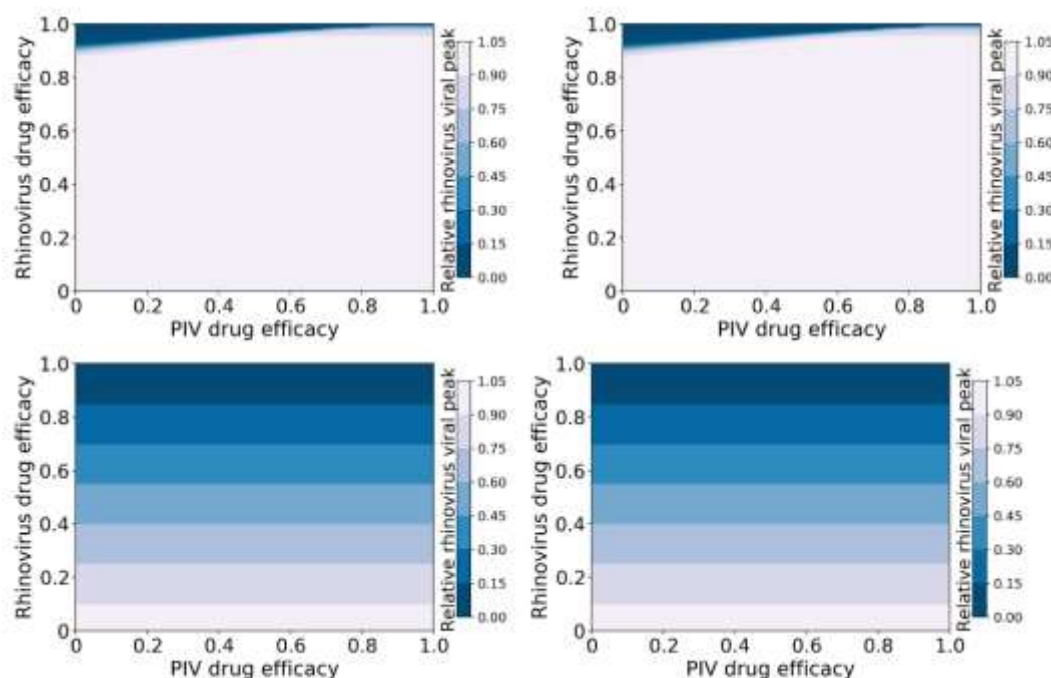

**Figure S15.** Rhinovirus viral titer peak for treated rhinovirus and PIV coinfections. Figures show the rhinovirus viral titer peak relative to an untreated coinfection where a value of 1 indicates that treatment has not changed the peak viral load. Figures show treatment with both antivirals reducing infection rate (top left); the rhinovirus antiviral reducing infection rate and the PIV antiviral reducing viral production (top right); the rhinovirus antiviral reducing viral production and the PIV antiviral reducing infection rate (bottom left); and both antivirals reducing viral production (bottom right).

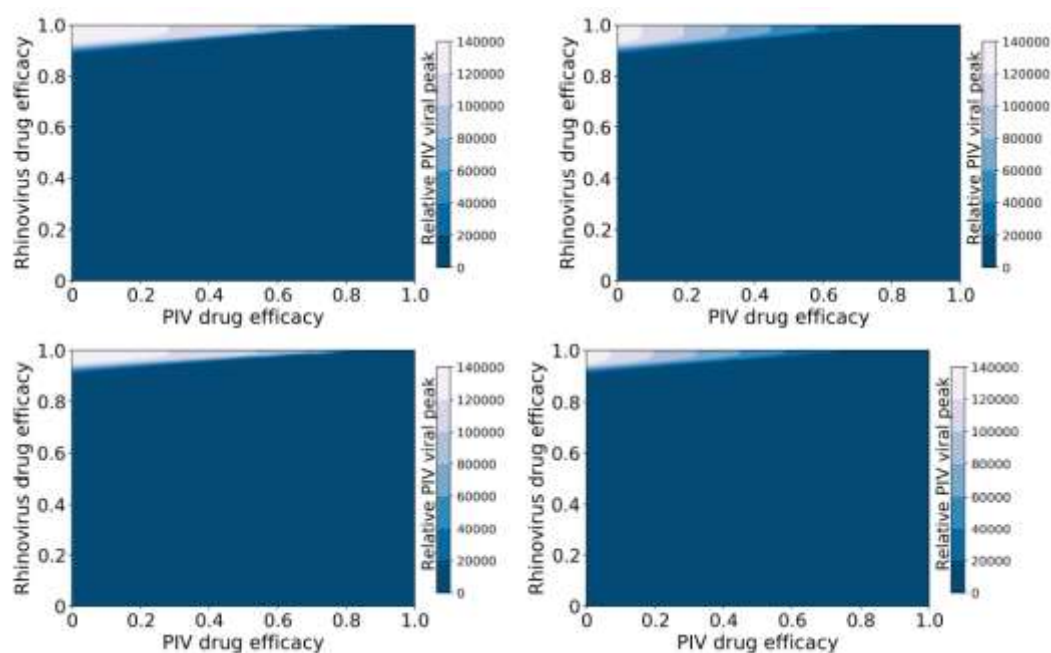

**Figure S16.** PIV viral titer peak for treated rhinovirus and PIV coinfections. Figures show the PIV viral titer peak relative to an untreated coinfection where a value of 1 indicates that treatment has not changed the peak viral load. Figures show treatment with both antivirals reducing infection rate (top left); the rhinovirus antiviral reducing infection rate and the PIV antiviral reducing viral production (top right); the rhinovirus antiviral reducing viral production and the PIV antiviral reducing infection rate (bottom left); and both antivirals reducing viral production (bottom right).
